# Supplementary material for: The Spatiotemporal Evolution of Lymph Node Spread in Early Breast Cancer
Source: Oxford University Press journal article supplement (doi:10.1158/1078-0432.ccr-17-3374), 2018-06-11
Supplement: 10780432ccr173374-sup-192261_3_supp_4772473_p93fbz.xlsx [file 10780432ccr173374-sup-192261_3_supp_4772473_p93fbz.xlsx]

## Sheet: ClinicalInfos
Patient	Age	Surgery	Type	Grade	Size (mm)	ER	PgR	HER2	LVI	No. nodes	Adjuvant	Follow-up*	Relapse
Pat.2	61	Mx	IDC	3	38	8	8	neg	focal	3/19	C,AI	34.1	no
Pat.3	73	Mx	IDC	3	45	7	4	neg	focal	4/9	AI	36.8	no
Pat.4	56	Mx	IDC	3	40	0	0	pos	no	1/18	C,Ab2,RT	38.5	no
Pat.5	38	WLE	IDC	3	40	3	0	pos	extensive	27/27	C, Ab2	2.6#	no
Pat.6	64	WLE	IDC	3	45	0	0	neg	extensive	3/18	V	31.4	no
Pat.7	50	Mx	ILC	2	60	8	8	neg	no	20/30	C,AI	36.5	no
Pat.9	46	Mx	IDC	2	50	8	8	neg	extensive	2/8	FEC-T, Tam	28.8	systemic1
Pat.10	48	WLE	ILC	2	68	8	8	neg	no	29/31	C,T,RT	35.6	no
Pat.11	44	WLE	IDC	3	50	0	0	neg	focal	5/30	C,RT	27.7	no
Pat.14	81	WLE	IDC (A)	2	21	0	0	neg	no	1/20	RT	33.4	no
Pat.16	76	Mx	IDC	3	127	0	0	neg	extensive	10/15	C	9	systemic2
Legend
Surgery; WLE, Wide Local Excision; Mx, Mastectomy
IDC, Invasive Ductal Carcinoma (not otherwise specified); ILC, Invasive Lobular Carcinoma, (A) Apocrine, Grading - modified Bloom-Richardson;
Size (in mm), maximum single dimension of invasive component;
ER, Estrogen Receptor; PgR, Progesterone Receptor. Hormone receptor scores as Allred scores; HER2 (human epidermal growth factor receptor 2)
as per ASCO CAPS guidelines; LVI, Lymphovascular invasion; focal - within main tumour; extensive - beyond main tumour;
No. nodes, number of histologically involved nodes / total nodes removed (all patients had axillary lymphadenectomy).
Adjuvant therapies: OFS, Ovarian function suppression (Tamoxifen and goserelin); C, chemotherapy (either FEC or FEC-T), AI - aromatase inhibitor;
Ab2 - dual antiHER2 antibody therapy (Trastuzumab and pertuzumab); V - vaccine trial; RT - external beam radiotherapy;
*calculated (in months) from date of primary surgery to last follow-up or death; # lost to follow-up
1lepto-meningeal; 2 lung, liver and bone, both died of progressive disease.
